# Supplementary material for: 3-Trinitromethyl-4-nitro-5-nitramine-1H-pyrazole: a high energy density oxidizer
Source: Royal Society of Chemistry journal article supplement (doi:10.1039/c9nj02732g), 2019-01-01
Supplement: c9nj02732g1.pdf [file c9nj02732g1.pdf]

*New Journal of Chemistry*

Supporting Information

**3-Trinitromethyl-4-nitro-5-nitramine-1H-pyrazole: A High Energy  
Density Oxidizer**

Hualin Xiong<sup>a</sup>, Hongwei Yang<sup>a</sup> and Guangbin Cheng<sup>a\*</sup>

<sup>a</sup>School of Chemical Engineering, Nanjing University of Science and Technology Nanjing 210094, P. R. China

**Email: [gcheng@mail.njust.edu.cn](mailto:gcheng@mail.njust.edu.cn)**

## Table of Contents

|                                                                  |     |
|------------------------------------------------------------------|-----|
| 1. Computational details.....                                    | 1   |
| 2. Crystallographic data for compound 5.....                     | 2-3 |
| 3. <sup>1</sup> H NMR and <sup>13</sup> C NMR of compound 5..... | 4-5 |
| 4. The DSC plot of compound 5.....                               | 5   |
| 5. References.....                                               | 5   |

## 1. Computational Details

Computations were performed by using the Gaussian09 suite of programs.<sup>1</sup> The elementary geometric optimization and the frequency analysis were performed at the level of the Becke three parameter, Lee-Yang-Parr (B3LYP) functional with the 6-311+G\*\* basis set.<sup>2-4</sup> All of the optimized structures were characterized to be local energy minima on the potential surface without any imaginary frequencies. Atomization energies were calculated by the CBS-4M.<sup>5</sup> All the optimized structures were characterized to be true local energy minima on the potential-energy surface without imaginary frequencies. The predictions of heats of formation (HOF) of compounds used the hybrid DFT-B3LYP methods with the 6-311+G\*\* basis set through designed isodesmic reactions. The isodesmic reaction processes, that is, the number of each kind of formal bond is conserved, were used with the application of the bond separation reaction (BSR) rules. The molecule was broken down into a set of two heavy-atom molecules containing the same component bonds. The isodesmic reaction used to derive the HOF of the title compound **5** is in Scheme S1. The change of enthalpy for the reactions at 298 K can be expressed as

$$\Delta H_{298} = \sum \Delta_f H_P - \sum \Delta_f H_R \quad (1)$$

where  $\Delta_f H_R$  and  $\Delta_f H_P$  are the HOF of reactants and products at 298 K, respectively, and  $\Delta H_{298}$  can be calculated using the following expression:

$$\Delta H_{298} = \Delta E_{298} + \Delta(PV) = \Delta E_0 + \Delta ZPE + \Delta H_T + \Delta nRT \quad (2)$$

where  $E_0$  is the change in total energy between the products and the reactants at 0 K;  $ZPE$  is the difference between the zero-point energies ( $ZPE$ ) of the products and the reactants at 0 K;  $H_T$  is thermal correction from 0 to 298 K. The ( $PV$ ) value in eq (2) is the  $PV$  work term. It equals  $nRT$  for the reactions of ideal gas. For the isodesmic reactions,  $n = 0$ , so  $(PV) = 0$ . On the left side of Eq. (1), apart from target compound, all the others are called reference compounds. The HOF of reference compounds are available either from the experiments or from the high level computing like CBS-4M.

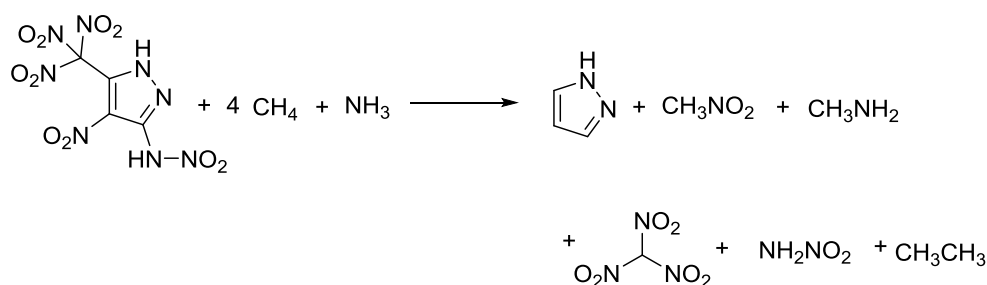

Scheme S1. The isodesmic reactions for calculating heat of formation for **5**

The solid-state enthalpy of formation for compound **5** can be estimated by subtracting the heat of sublimation from gas-phase heat of formation. On the basis of the literature,<sup>6</sup> the heat of sublimation can be estimated with Trouton's rule according to supplementary equation 1, where  $T$  represents either the melting point or the decomposition temperature when no melting occurs prior to decomposition.<sup>7</sup>

$$\Delta H_f(s) = \Delta H_f(g) - \Delta H_{\text{sub}} = \Delta H_f(g) - 188[\text{J mol}^{-1} \text{K}^{-1}] \quad (\text{equation 1})$$

**Table S1.** Calculated zero-point energy (ZPE), thermal correction to enthalpy ( $H_T$ ), total energy ( $E_0$ ) and heats of formation (HOF)

| Compound                          | $E_0$ / a.u. | ZPE / kJ mol <sup>-1</sup> | $\Delta H_T$ / kJ mol <sup>-1</sup> | HOF/kJ mol <sup>-1</sup> |
|-----------------------------------|--------------|----------------------------|-------------------------------------|--------------------------|
| <b>5</b>                          | -1343.640616 | 319.92                     | 53.37                               | 320.2                    |
| CH <sub>4</sub>                   | -40.5339263  | 112.26                     | 10.04                               | -74.60 <sup>b</sup>      |
| NH <sub>3</sub>                   | -56.5826356  | 86.27                      | 10.05                               | -45.9 <sup>b</sup>       |
| pyrazole                          | -226.2603313 | 179.2                      | 12.57                               | 177.4 <sup>b</sup>       |
| CH(NO <sub>2</sub> ) <sub>3</sub> | -654.163836  | 136.82                     | 26.41                               | -13.4 <sup>c</sup>       |
| NH <sub>2</sub> NO <sub>2</sub>   | -261.1248168 | 98.79                      | 12.39                               | -3.9 <sup>c</sup>        |
| CH <sub>3</sub> NO <sub>2</sub>   | -245.0915559 | 124.93                     | 11.60                               | -80.80 <sup>b</sup>      |
| CH <sub>3</sub> CH <sub>3</sub>   | -79.8565413  | 187.31                     | 11.79                               | -84.01 <sup>b</sup>      |

<sup>a</sup>  $E_0$  in a.u. ZPE (vibrational zero-point energy),  $\Delta H_T$  (thermal correction to enthalpy) and HOF are in kJ mol<sup>-1</sup>. <sup>b</sup> Data are from Ref. [D. R. Lide, ed., CRC Handbook of Chemistry and Physics, 88th Edition (Internet Version 2008), CRC Press/Taylor and Francis, Boca Raton, FL.]. <sup>c</sup> Data obtained from CBS-4M calculation in combination with the atomization reaction of the corresponding compound.

## 2. Crystallographic data for 5

**Table S2** Crystallographic data for 5

|                                           |                                               |
|-------------------------------------------|-----------------------------------------------|
| Empirical Formula                         | C4H2N8O10                                     |
| Formula Weight                            | 322.14                                        |
| Temperature/K                             | 173(2)                                        |
| Crystal system                            | orthorhombic                                  |
| Space group                               | P2 <sub>1</sub> 2 <sub>1</sub> 2 <sub>1</sub> |
| a/Å                                       | 6.7073(4)                                     |
| b/Å                                       | 8.8246(7)                                     |
| c/Å                                       | 18.6187(12)                                   |
| $\alpha$ /°                               | 90                                            |
| $\beta$ /°                                | 90                                            |
| $\gamma$ /°                               | 90                                            |
| Volume/Å <sup>3</sup>                     | 1102.03(13)                                   |
| Z                                         | 4                                             |
| $\rho$ (calc) mg/mm <sup>3</sup>          | 1.942                                         |
| Absorption coefficient m/mm <sup>-1</sup> | 0.192                                         |
| F(000)                                    | 648.0                                         |
| Crystal size/mm <sup>3</sup>              | 0.32 × 0.26 × 0.2                             |
| 2 $\theta$ range for data collection      | 6.362 to 52.9 °                               |
| Index ranges                              | -8 ≤ h ≤ 8, -10 ≤ k ≤ 10, -22 ≤ l ≤ 22        |
| Reflections collected                     | 12743                                         |
| Independent reflections                   | 2249[R(int)=0.067]                            |
| Data/restraints/parameters                | 2249/0/205                                    |
| Goodness-of-fit on F <sup>2</sup>         | 1.041                                         |

|                                         |                |
|-----------------------------------------|----------------|
| Final R indexes [ $I \geq 2\sigma(I)$ ] | 0.0356, 0.0634 |
| Final R indexes [all data]              | 0.0589, 0.0698 |
| CCDC                                    | 1847087        |

**Table S3** Selected bond lengths [ $\text{\AA}$ ] and angles [ $^\circ$ ] for compound **5**

|             |           |             |           |
|-------------|-----------|-------------|-----------|
| O1-N4       | 1.231(4)  | N2-C1       | 1.338(4)  |
| O2-N4       | 1.210(4)  | N3-N4       | 1.369(4)  |
| O3-N5       | 1.226(3)  | N3-C1       | 1.371(4)  |
| O4-N5       | 1.238(3)  | N5-C2       | 1.419(4)  |
| O5-N6       | 1.214(4)  | N6-C4       | 1.535(4)  |
| O6-N6       | 1.206(4)  | N7-C4       | 1.537(4)  |
| O7-N7       | 1.212(4)  | N8-C4       | 1.546(4)  |
| O8-N7       | 1.208(3)  | N2-H2A      | 0.81(4)   |
| O9-N8       | 1.210(4)  | N3-H3A      | 0.81(3)   |
| O10-N8      | 1.209(3)  | C1-C2       | 1.382(4)  |
| N1-N2       | 1.348(4)  | C2-C3       | 1.415(4)  |
| N1-C3       | 1.322(4)  | C3-C4       | 1.477(4)  |
| N2-N1-C3    | 105.3(3)  | C1-N2-H2A   | 129(2)    |
| N1-N2-C1    | 113.2(2)  | N4-N3-H3A   | 115(2)    |
| N4-N3-C1    | 122.5(3)  | C1-N3-H3A   | 119(2)    |
| O1-N4-O2    | 126.7(3)  | N3-C1-C2    | 128.3(3)  |
| O1-N4-N3    | 116.9(3)  | N2-C1-N3    | 125.8(3)  |
| O2-N4-N3    | 116.3(3)  | N2-C1-C2    | 105.8(2)  |
| O3-N5-O4    | 123.9(3)  | N5-C2-C3    | 128.1(3)  |
| O3-N5-C2    | 118.6(3)  | C1-C2-C3    | 105.4(3)  |
| O4-N5-C2    | 117.6(3)  | N5-C2-C1    | 126.5(3)  |
| O5-N6-O6    | 127.3(3)  | N1-C3-C2    | 110.4(3)  |
| O5-N6-C4    | 116.0(2)  | N1-C3-C4    | 118.9(3)  |
| O6-N6-C4    | 116.6(2)  | C2-C3-C4    | 130.6(3)  |
| O7-N7-O8    | 128.1(3)  | N7-C4-C3    | 109.7(2)  |
| O7-N7-C4    | 116.2(3)  | N8-C4-C3    | 112.5(2)  |
| O8-N7-C4    | 115.6(2)  | N7-C4-N8    | 105.7(2)  |
| O9-N8-O10   | 127.5(3)  | N6-C4-N7    | 106.1(2)  |
| O9-N8-C4    | 117.5(3)  | N6-C4-N8    | 107.9(2)  |
| O10-N8-C4   | 114.9(2)  | N6-C4-C3    | 114.3(2)  |
| N1-N2-H2A   | 118(2)    | O3-N5-C2-C3 | -178.3(3) |
| C3-N1-N2-C1 | 1.8(3)    | O4-N5-C2-C1 | -177.9(3) |
| N2-N1-C3-C2 | -1.1(3)   | O5-N6-C4-C3 | 159.9(3)  |
| N2-N1-C3-C4 | -177.3(2) | O6-N6-C4-N8 | 106.6(3)  |
| N1-N2-C1-N3 | -178.4(3) | O5-N6-C4-N8 | -74.1(3)  |
| N1-N2-C1-C2 | -1.7(3)   | O6-N6-C4-C3 | -19.5(4)  |
| C1-N3-N4-O1 | 12.2(4)   | O6-N6-C4-N7 | -140.5(3) |
| C1-N3-N4-O2 | -169.5(3) | O5-N6-C4-N7 | 38.8(3)   |
| N4-N3-C1-N2 | -45.8(4)  | O7-N7-C4-C3 | 102.8(3)  |

|              |           |              |           |
|--------------|-----------|--------------|-----------|
| N4-N3-C1-C2  | 138.4(3)  | O7-N7-C4-N8  | -18.8(3)  |
| O3-N5-C2-C1  | 1.9(4)    | O7-N7-C4-N6  | -133.2(3) |
| O4-N5-C2-C3  | 1.9(4)    | O9-N8-C4-N7  | -86.1(3)  |
| O8-N7-C4-N8  | 163.5(2)  | O10-N8-C4-C3 | -28.1(3)  |
| O8-N7-C4-C3  | -75.0(3)  | O9-N8-C4-C3  | 154.2(3)  |
| O8-N7-C4-N6  | 49.0(3)   | O10-N8-C4-N6 | -155.2(2) |
| C1 -C2-C3-N1 | 0.1(3)    | O9 -N8-C4-N6 | 27.1(3)   |
| N5 -C2-C3-N1 | -179.7(3) | O10-N8-C4-N7 | 91.6(3)   |
| C1 -C2-C3-C4 | 175.8(3)  | N3 -C1-C2-N5 | -2.7(5)   |
| N1 -C3-C4-N8 | 123.9(3)  | N3 -C1-C2-C3 | 177.4(3)  |
| C2 -C3-C4-N7 | -168.7(3) | N2 -C1-C2-C3 | 0.9(3)    |
| C2 -C3-C4-N8 | -51.4(4)  | N2 -C1-C2-N5 | -179.2(3) |
| C2 -C3-C4-N6 | 72.2(4)   | N5 -C2-C3-C4 | -4.1(5)   |
| N1 -C3-C4-N6 | -112.5(3) | N1 -C3-C4-N7 | 6.6(4)    |

**Table S4** Hydrogen bonds for compound **5**

| D—H ...A                     | d(D-H)/ Å | d(H...A)/ Å | d(D...A)/ Å | <(DHA)/ ° |
|------------------------------|-----------|-------------|-------------|-----------|
| N2-- H2A ...O1               | 0.81(4)   | 2.46(3)     | 2.757(4)    | 103(3)    |
| N2-- H2A ..O1 <sup>i</sup>   | 0.81(4)   | 2.19(4)     | 2.936(4)    | 155(3)    |
| N3-- H3A ..O3                | 0.81(3)   | 2.33(4)     | 2.819(3)    | 120(3)    |
| N3-- H3A ...O4 <sup>ii</sup> | 0.81(3)   | 2.20(3)     | 2.968(3)    | 159(3)    |

Symmetry Code: i: -1/2+x, 1/2-y,2-z, ii: 1-x,-1/2+y,3/2-z

### 3. <sup>1</sup>H NMR and <sup>13</sup>C NMR of compound **5**

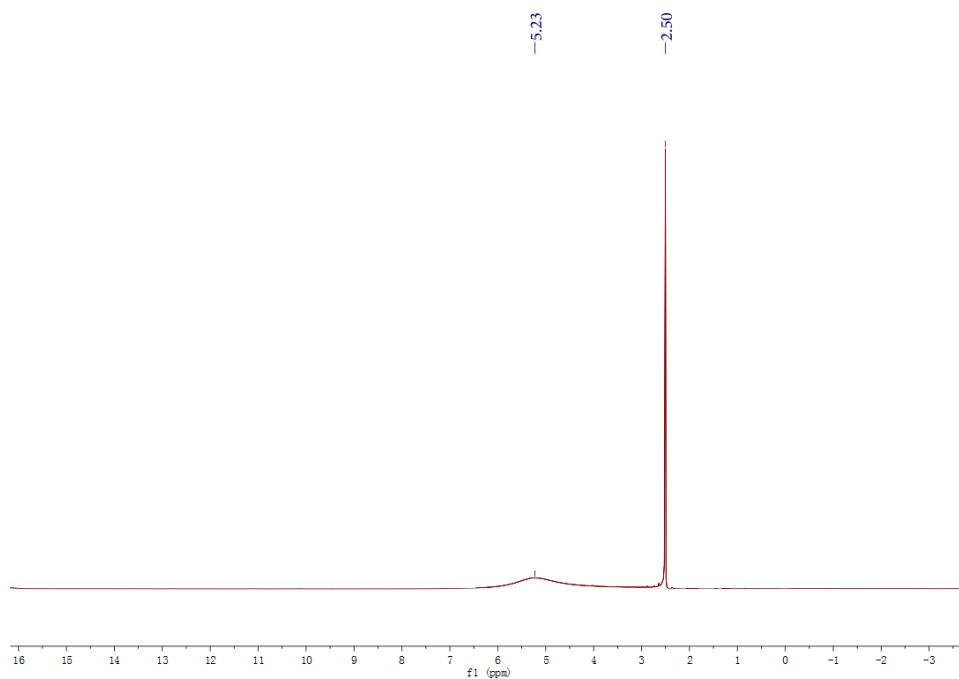

**Figure S1.** <sup>1</sup>H NMR spectra in DMSO-*d*<sub>6</sub> for **5**

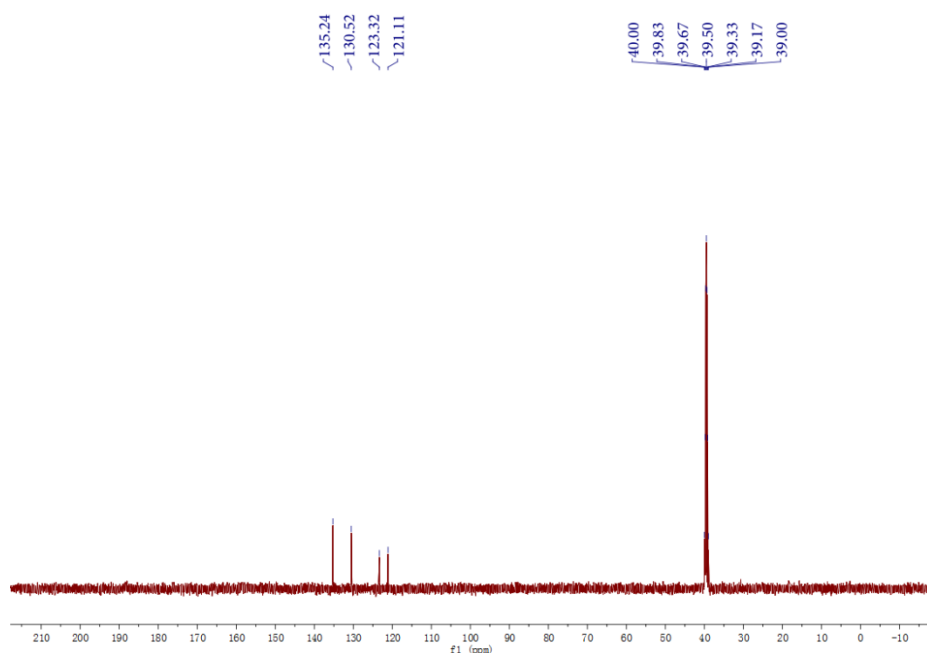

Figure S2.  $^{13}\text{C}$  NMR spectra in  $\text{DMSO-}d_6$  for **5**

#### 4. The DSC Plots of compounds **5**

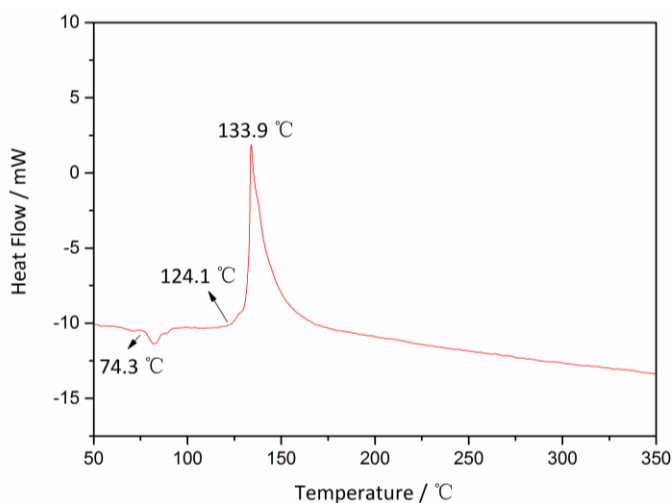

Figure S3. The DSC curve of compound **5** measured at a heating rate of  $5\text{ }^\circ\text{C min}^{-1}$

#### 5. References

- [1] M. J. Frisch, et al. Gaussian 09, Revision D. 01 (Gaussian Inc., 2009).
- [2] A. D. Becke, *J. Chem. Phys.* 1993, **98**, 5648-5652
- [3] P. J. Stephens; F. J. Devlin; C. F. Chabalowski; M. J. Frisch. *J. Phys. Chem.* 1994, **98**, 11623-11627.
- [4] P. C. Hariharan; J. A. Pople, *Theor. Chim. Acta.* 1973, **28**, 213-222.
- [5] J. W. Ochterski; G. A. Petersson ; J. A. Montgomery, *J. Chem. Phys.* 1996, **104**, 2598-2619.
- [6] F. Trouton, *Philos. Mag.* 1884, **18**, 54-55.
- [7] M. S. Westwell, M. S. Searle, D. J. Wales, D. H. Williams, *J. Am. Chem. Soc.* 1995, **117**, 5013-5015.
